# Supplementary material for: 14-3-3 Proteins Interact with a Hybrid Prenyl-Phosphorylation Motif to Inhibit G Proteins
Source: PubMed Central journal article supplement (PMC3690454; doi:10.1016/j.cell.2013.03.044), 2013-04-25
Supplement: mmc1.pdf [file mmc1.pdf]

**Table S1. Identification of 14-3-3 Proteins as Rnd3 Interactors by Mass Spectrometry, Related to Figure 1**

| protein I.D.      | accession no. | MW (Da) | pI   | no. peptides | unique peptides | % coverage |
|-------------------|---------------|---------|------|--------------|-----------------|------------|
| Rnd3              | P61587        | 27351   | 8.78 | 14           | 14              | 63         |
| 14-3-3 $\epsilon$ | P62258        | 29155   | 4.63 | 9            | 7               | 51         |
| 14-3-3 $\gamma$   | P61981        | 28285   | 4.8  | 9            | 4               | 37         |
| 14-3-3 $\zeta$    | P63104        | 27728   | 4.73 | 6            | 3               | 33         |
| 14-3-3 $\beta$    | P31946        | 28065   | 4.76 | 5            | 3               | 24         |

FLAG-Rnd3 was expressed in COS7 cells. FLAG-Rnd3 immunoprecipitates were resolved by SDS-PAGE, and the corresponding bands excised from the gel and analysed by mass spectrometry. Endogenous 14-3-3 proteins, which migrate at a similar molecular weight to FLAG-Rnd3, were identified.

**Table S2. 14-3-3 $\beta$  Inhibits Rnd3-Induced Morphological Changes, Related to Figure 3**

| comparison                          | p-value | statistical significance |
|-------------------------------------|---------|--------------------------|
| mock : $\beta$                      | 0.957   | NS                       |
| mock : Rnd3WT                       | <0.001  | ***                      |
| mock : Rnd3WT+ $\beta$              | <0.001  | ***                      |
| mock : Rnd3A240                     | <0.001  | ***                      |
| mock : Rnd3A240+ $\beta$            | <0.001  | ***                      |
| $\beta$ : Rnd3WT                    | <0.001  | ***                      |
| $\beta$ : Rnd3WT+ $\beta$           | <0.001  | ***                      |
| $\beta$ : Rnd3A240                  | <0.001  | ***                      |
| $\beta$ : Rnd3A240+ $\beta$         | <0.001  | ***                      |
| Rnd3WT : Rnd3WT+ $\beta$            | <0.001  | ***                      |
| Rnd3WT : Rnd3A240                   | 0.999   | NS                       |
| Rnd3WT : Rnd3A240+ $\beta$          | 0.999   | NS                       |
| Rnd3WT+ $\beta$ : Rnd3A240          | <0.001  | ***                      |
| Rnd3WT+ $\beta$ : Rnd3A240+ $\beta$ | <0.001  | ***                      |
| Rnd3A240 : Rnd3A240+ $\beta$        | 0.991   | NS                       |

NIH3T3 cells were transfected with the indicated FLAG-Rnd3 and HA-14-3-3 $\beta$  constructs, and after 24 h were fixed and stained for F-actin, and with antibodies to FLAG and HA epitopes. Technical triplicates within 3 independent experiments were summed to give cell counts per experiment per phenotype per condition (n=300). A Poisson model (generalized linear model) was used to fit the data, allowing the number of counted cells to vary between the treatment, the phenotype observed, and the two-way interactions between these. A multiple pairwise comparison between the cells with a “normal” phenotype for the various conditions was then performed and corrected for multiple testing by Tukey's method. The p-values for comparisons were calculated.  $\beta$ , 14-3-3 $\beta$ ; NS, not significant.

**Table S3. Rnd3 Peptide Sequences, Related to Figure 5**

| peptide sequence                              | name | experiment used for             |
|-----------------------------------------------|------|---------------------------------|
| N-DLRKDKAKSC-C                                | -P-F | ITC                             |
| N-DLRKDKAK <b>p</b> SC-C                      | +P-F | ITC                             |
| N-DLRKDKAKSC(S-farnesyl)-C                    | -P+F | ITC                             |
| N-DLRKDKAK <b>p</b> SC(S-farnesyl)-C          | +P+F | ITC + crystal structure         |
| N-CDRSK <b>p</b> SAPTS-C                      | PKC  | peptide competition             |
| N-Bio-Eahx-DLRKDKAKSC-C                       | -P-F | peptide competition & pull-down |
| N-Bio-Eahx-DLRKDKAK <b>p</b> SC-C             | +P-F | peptide competition & pull-down |
| N-Bio-Eahx-DLRKDKAKSC(S-farnesyl)-C           | -P+F | peptide competition & pull-down |
| N-Bio-Eahx-DLRKDKAK <b>p</b> SC(S-farnesyl)-C | +P+F | peptide competition & pull-down |

Peptide sequences from Rnd3 C-terminus (last 10 amino acids of the protein sequence from amino (N-) to carboxy (-C) terminus) are shown in single letter amino acid code, with **pS** denoting phosphorylated serine. The farnesylation on C241 is indicated in brackets. Also shown is a PKC $\epsilon$  peptide corresponding to a high affinity 14-3-3 binding sequence (Saurin et al., 2008), which was used as a positive control and inhibited the Rnd3/14-3-3 interaction. P, phosphorylated; F, farnesylated; Bio, biotinylated; ITC, isothermal titration calorimetry.

**Table S4. X-Ray Data Collection and Refinement Statistics, Related to Figure 6**

| <b>14-3-3/Rnd3 peptide</b>                          |                                                               |
|-----------------------------------------------------|---------------------------------------------------------------|
| <b>Data collection</b>                              |                                                               |
| Space group                                         | P2 <sub>1</sub> 2 <sub>1</sub> 2 <sub>1</sub>                 |
| Cell dimensions                                     |                                                               |
| <i>a</i> , <i>b</i> , <i>c</i> (Å)                  | 70.78, 81.31, 111.19                                          |
| α, β, γ (°)                                         | 90, 90, 90                                                    |
| Resolution (Å)                                      | 2.3                                                           |
| <i>R</i> <sub>merge</sub> (%)                       | 8.4 (53.9)                                                    |
| <i>I</i> / σ <i>I</i>                               | 5.9 (1.2)                                                     |
| Completeness (%)                                    | 99.1 (99.1)                                                   |
| Multiplicity                                        | 3.21 (3.20)                                                   |
| Wilson B                                            | 53.3                                                          |
| Wavelength (Å)                                      | 0.97                                                          |
| Detector Distance (mm)                              | 439                                                           |
| <b>Refinement</b>                                   |                                                               |
| Resolution (Å)                                      | 2.3                                                           |
| No. reflections (unique)                            | 92928 (28921)                                                 |
| <i>R</i> <sub>work</sub> / <i>R</i> <sub>free</sub> | 24.4 / 27.3                                                   |
| No. Atoms                                           |                                                               |
| Protein                                             | 3652 (including Farnesyl)                                     |
| Ligand/ion                                          | 63 (PEG)                                                      |
| Water                                               | 80                                                            |
| <i>B</i> -factors                                   |                                                               |
| Protein                                             | Chain A: 71.2, Chain B: 64.9, Chain Q: 88.5, Chain R:<br>83.4 |
| Ligand/ion                                          | Chain P (PEG): 70.2                                           |
| Water                                               | Chain W: 100.4                                                |
| R.m.s. deviations                                   |                                                               |
| Bond lengths (Å)                                    | 0.001                                                         |
| Bond angles (°)                                     | 0.495                                                         |

**Table S5. Interactions of C-Terminal Peptides from Candidate Proteins with 14-3-3, Related to Figure 7**

| protein | peptide sequence        | $K_D$ (nM) | $k_{on}$ ( $M^{-1}s^{-1}$ ) | $k_{off}$ ( $s^{-1}$ ) | $\chi^2$ | $R^2$ |
|---------|-------------------------|------------|-----------------------------|------------------------|----------|-------|
| Rap1A   | EKKKPKKK <b>pS</b> C-GG | 23.6       | $1.4 \times 10^6$           | $3.4 \times 10^{-2}$   | 0.20     | 0.99  |
| PDE6C   | GGDDKKS <b>KpT</b> C-GG | 44.5       | $4.1 \times 10^5$           | $1.8 \times 10^{-2}$   | 0.03     | 0.99  |
| RPRG    | TNTERRSK <b>pS</b> C-GG | 95         | $2.4 \times 10^5$           | $2.2 \times 10^{-2}$   | 0.03     | 0.99  |
| Rap1B   | PGKARKKS <b>pS</b> C-GG | 170        | $3.2 \times 10^5$           | $5.5 \times 10^{-2}$   | 0.01     | 0.99  |
| RhoG    | PTPIKRGR <b>pS</b> C-GG | 868        | $4.1 \times 10^4$           | $3.5 \times 10^{-2}$   | 0.02     | 0.99  |

The affinities of the indicated phosphorylated and geranylgeranylated peptides for 14-3-3 $\zeta$  were determined by biolayer interferometry using an Octet Red96 instrument. Data of a typical experiment ( $n \geq 3$ ) along with statistics of the fit ( $\chi^2$ ,  $R^2$ ) are shown. Peptide sequences from the C-terminus of the indicated proteins (last 10 amino acids of the mature protein sequence, terminating with Cys of CAAX box) are shown in single letter amino acid code, with **pS/pT** denoting phosphorylated serine/threonine. The modifications added to the C-terminal Cys are indicated. GG, geranylgeranylated;  $K_D$ , dissociation constant;  $k_{on}$ , association rate constant;  $k_{off}$ , dissociation rate constant.
